# Supplementary material for: Redox controls RecA protein activity via reversible oxidation of its methionine residues
Source: eLife journal article supplement (doi:10.7554/elife.63747), 2021-02-19
Supplement: supp [file elife-63747-supp-v2.zip]

Archive with 4 entries (4 files):
- elife_poa_e63747_Figure_3_figure_supplement_1.pdf
- elife_poa_e63747_Figure_5_figure_supplement_1.pdf
- elife_poa_e63747_Figure_8_figure_supplement_1.pdf
- elife_poa_e63747_Transparent_Reporting_File.pdf
