# Supplementary figures and images for: Redox controls RecA protein activity via reversible oxidation of its methionine residues
Source: eLife journal article supplement (doi:10.7554/elife.63747), 2021-02-19

A

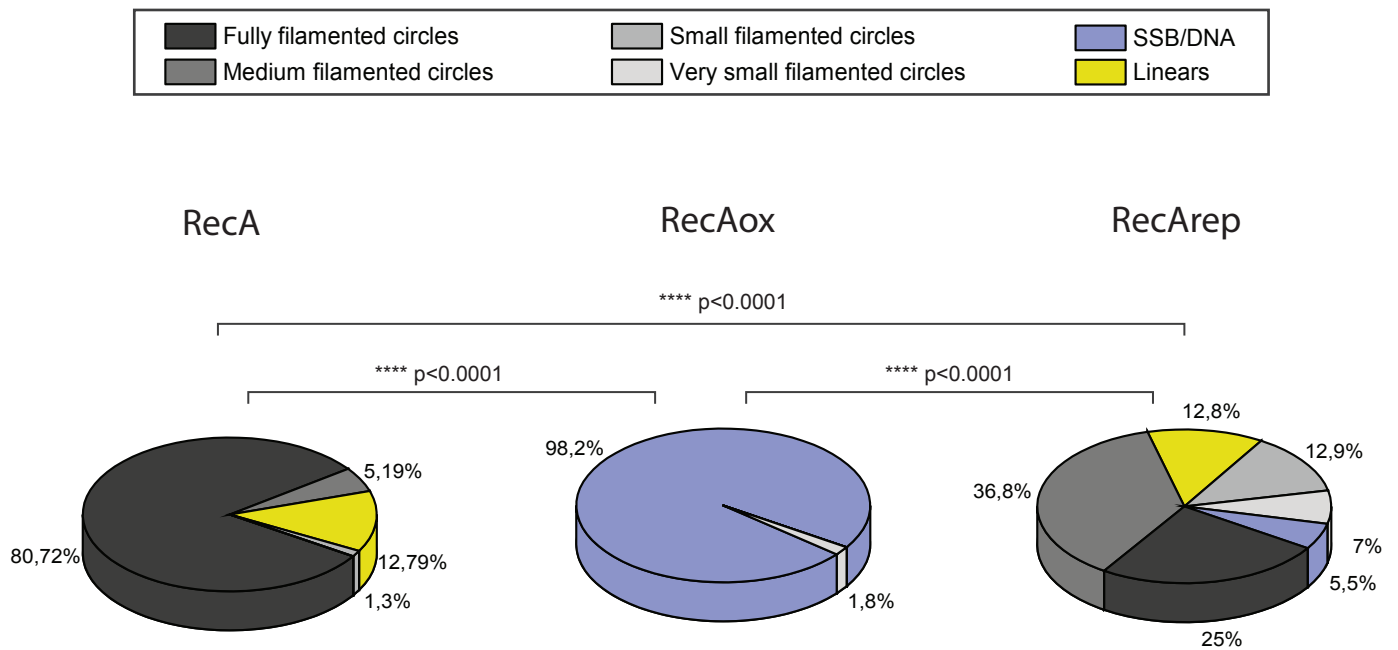

B

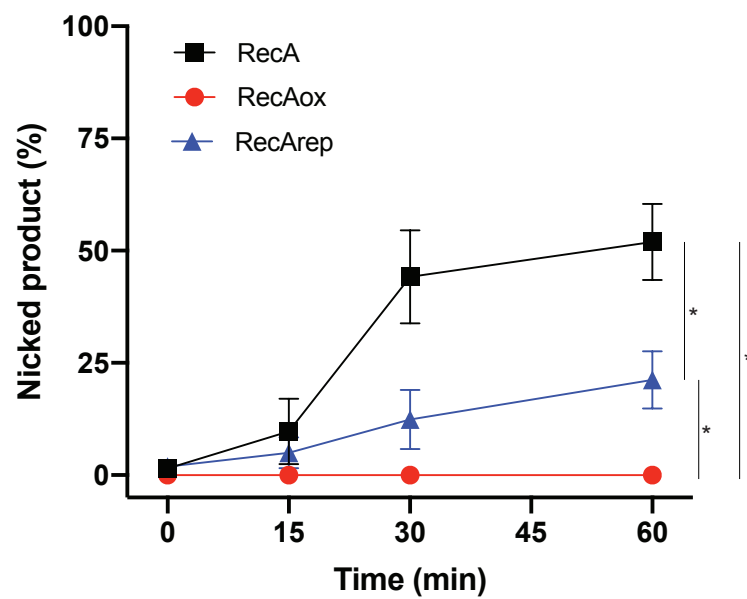

Figure supplement 1

Supplement: supp [file elife_poa_e63747_Figure_3_figure_supplement_1.pdf › elife_poa_e63747_Figure_3_figure_supplement_1.pdf]

**A**

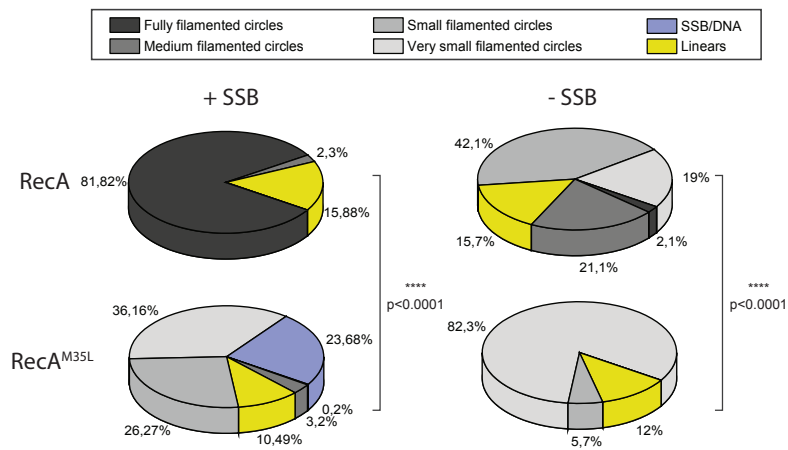

**B**

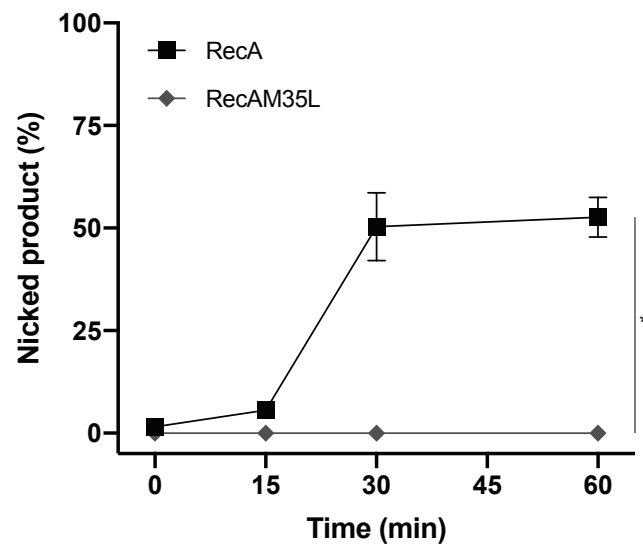

Figure supplement 2

Supplement: supp [file elife_poa_e63747_Figure_5_figure_supplement_1.pdf › elife_poa_e63747_Figure_5_figure_supplement_1.pdf]

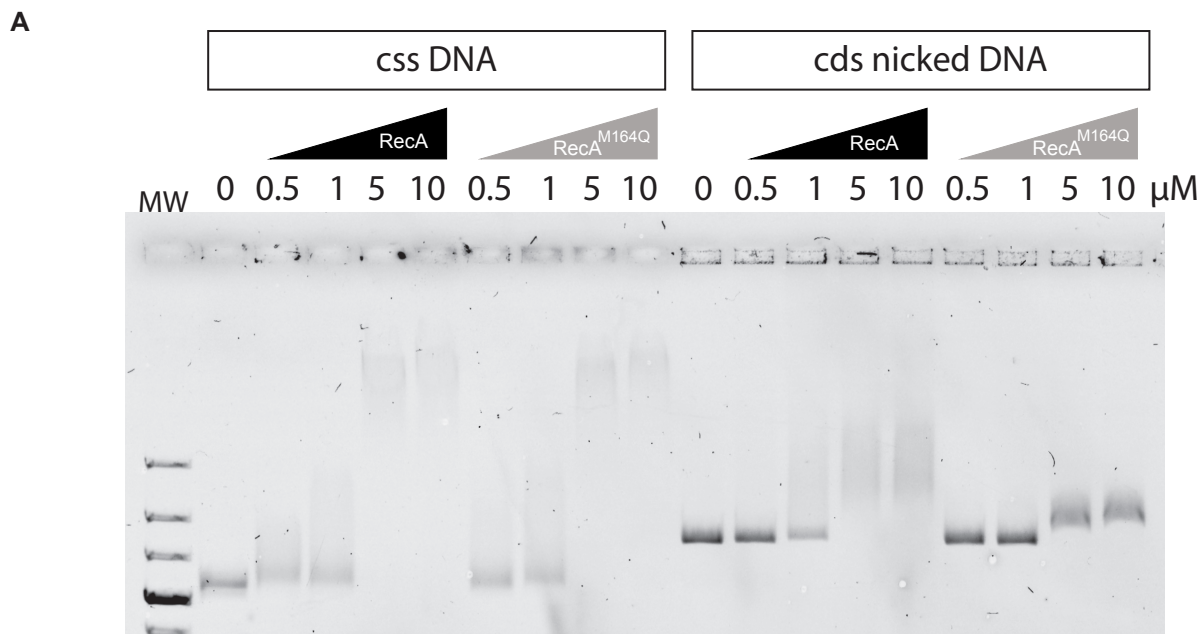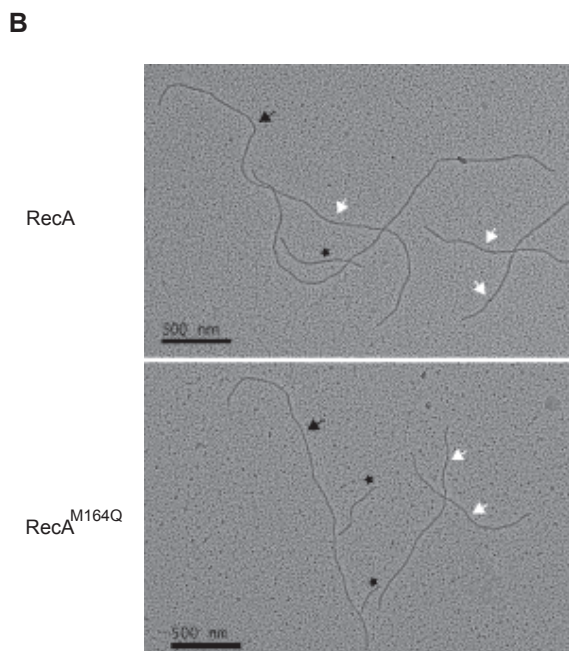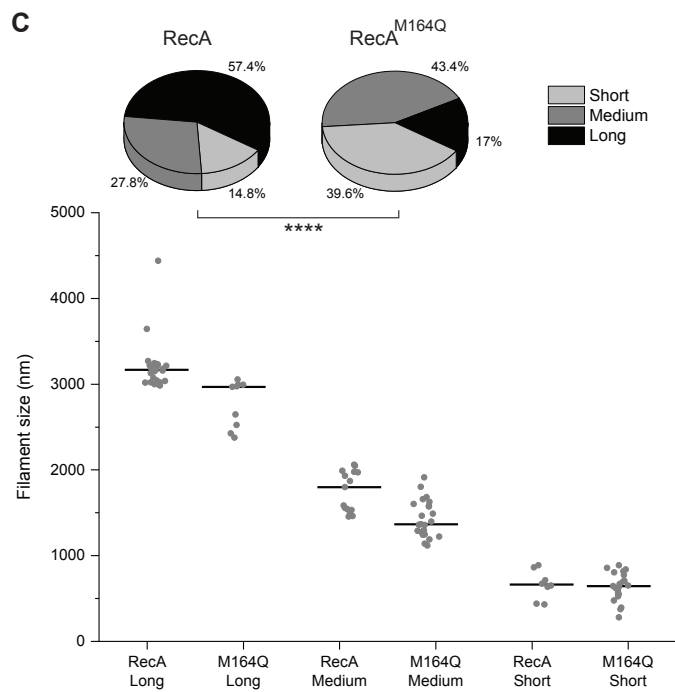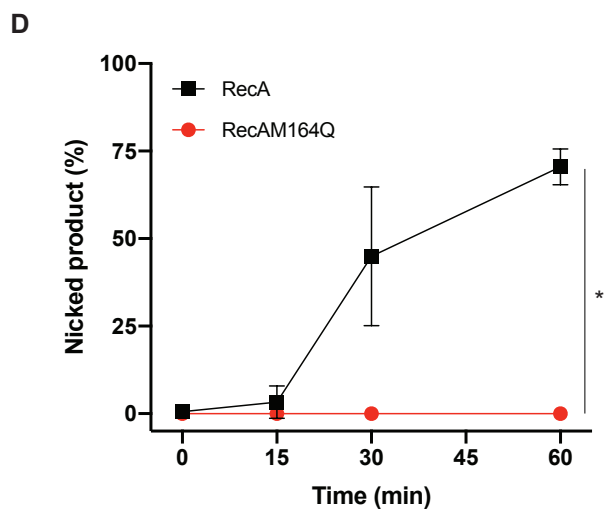

Figure supplement 3

Supplement: supp [file elife_poa_e63747_Figure_8_figure_supplement_1.pdf › elife_poa_e63747_Figure_8_figure_supplement_1.pdf]
